# Supplementary material
Source: publisher figshare collection journal article supplement (https://geolsoc.figshare.com/ndownloader/files/5422103)
Supplement: Supplementary file 1 [file 5422103]

mc3320 Procedural Blank			J=	3.97E-03	+/-	1.43E-05
			Vol36	Err36	Vol37	Err37	Vol38	Err38	Vol39	Err39	Vol40	Err40
			4.67	0.16	0.58	0.91	1.02	0.09	0.23	0.07	1440.20	3.56
mc3110			J=	4.93E-03	+/-	1.14E-05	tot.gas.age=	510.97	+/-	2.17	Reten.Age=	512.30	+-	2.37
mc31-10 MMhb-1 Hornblende	F39	Laser Power (mW)	Vol36	Err36	Vol37	Err37	Vol38	Err38	Vol39	Err39	Vol40	Err40	Age(Ma)	AgeErr
	0.003589	0	2.80002	0.10	4.60	0.31	0.98	0.11	2.06	0.11	850.32	1.30	96.33	123.24
	0.003835	100	0.11413	0.09	0.68	0.26	0.09	0.09	0.14	0.14	11.63	0.83	-2527.04	9144.72
	0.004049	150	-0.03944	0.11	0.44	0.22	0.10	0.11	0.12	0.10	4.03	0.84	880.68	1504.57
	0.004143	200	-0.03872	0.11	0.67	0.30	0.65	0.09	0.05	0.11	24.01	0.67	2618.69	3047.59
	0.004167	250	0.00448	0.09	0.46	0.37	0.09	0.10	0.01	0.09	6.71	0.76	1897.29	9794.79
	0.004219	300	0.03444	0.09	0.13	0.49	0.06	0.10	0.03	0.07	6.66	0.75	-1548.43	20162.60
	0.004353	400	-0.00222	0.10	0.30	0.39	0.39	0.12	0.08	0.09	21.77	0.69	1610.67	1886.48
	0.004631	500	-0.00283	0.10	0.74	0.39	0.24	0.08	0.16	0.08	18.89	0.61	858.40	1107.87
	0.005049	600	0.04242	0.10	1.05	0.34	0.45	0.10	0.24	0.06	18.62	0.62	213.02	978.76
	0.005898	800	0.11078	0.11	-0.09	0.57	1.19	0.10	0.49	0.10	56.85	0.75	393.56	473.98
	0.006916	1000	0.19733	0.11	0.67	0.36	0.41	0.06	0.58	0.10	56.07	1.11	-34.41	516.33
	0.008154	1200	0.22548	0.11	0.77	0.40	0.38	0.09	0.71	0.10	55.79	1.06	-141.05	437.99
	0.011057	1600	0.32627	0.12	1.72	0.29	0.81	0.09	1.67	0.09	159.05	1.05	306.78	156.61
	0.026417	2000	0.32531	0.12	17.71	0.47	1.99	0.10	8.81	0.17	657.94	1.06	492.96	28.24
	0.160998	2600	0.49574	0.10	202.35	1.06	13.55	0.24	77.23	0.50	5336.61	5.41	516.26	3.90
	0.213257	2800	0.57615	0.10	79.54	0.90	5.54	0.07	29.99	0.13	2093.71	2.04	495.67	6.87
	0.426671	3200	0.86177	0.12	310.65	1.24	25.46	0.32	122.47	0.40	8514.62	5.02	517.88	2.43
	0.543734	3600	0.59111	0.10	176.04	1.20	12.65	0.22	67.18	0.52	4684.96	4.43	515.84	4.55
	0.640700	4000	0.55282	0.11	140.64	0.89	10.12	0.13	55.64	0.19	3912.48	4.22	517.42	4.37
	0.930248	4001	2.10681	0.14	422.79	1.48	32.76	0.26	166.16	0.38	11798.56	8.04	516.65	2.04
	1.000000	4002	6.53053	0.14	99.56	1.23	8.74	0.14	40.03	0.15	4494.00	3.08	495.15	7.16
mc3318			J=	4.12E-03	+/-	1.01E-05	tot.gas.age=	517.84	+/-	2.19	Reten.Age=	519.44	+-	2.14
mc33-18 MMhb-1 Hornblende	F39	Laser Power (mW)	Vol36	Err36	Vol37	Err37	Vol38	Err38	Vol39	Err39	Vol40	Err40	Age(Ma)	AgeErr
	0.005269	0	2.28	0.10	2.37	0.16	0.65	0.07	1.41	0.07	712.83	1.14	188.72	133.90
	0.006201	100	0.00	0.06	0.37	0.12	0.14	0.04	0.25	0.09	3.85	0.45	97.76	469.78
	0.007208	150	0.04	0.07	0.51	0.14	0.14	0.06	0.27	0.08	8.19	0.42	-81.94	600.90
	0.007705	200	-0.04	0.07	0.51	0.13	0.32	0.06	0.13	0.08	11.57	0.60	1012.91	804.05
	0.008715	250	0.02	0.04	0.62	0.11	0.27	0.04	0.27	0.08	19.58	0.57	340.77	300.82
	0.008993	300	0.07	0.07	0.42	0.13	0.12	0.08	0.07	0.06	17.61	0.50	-281.32	2530.60
	0.010167	400	0.00	0.06	0.49	0.14	0.61	0.05	0.31	0.10	31.65	0.48	623.36	347.78
	0.011531	500	-0.02	0.05	0.37	0.22	0.18	0.08	0.36	0.05	27.30	0.41	562.51	239.14
	0.012091	600	0.01	0.06	0.23	0.27	0.32	0.08	0.15	0.07	24.08	0.39	843.89	599.77
	0.013532	800	0.00	0.06	0.24	0.11	0.15	0.06	0.39	0.06	41.45	0.42	643.51	272.54
	0.014663	1000	0.01	0.04	0.05	0.15	-0.17	0.10	0.30	0.05	32.88	0.42	639.62	244.56
	0.016730	1200	0.11	0.06	0.06	0.18	0.05	0.11	0.55	0.06	61.23	0.42	339.89	186.82
	0.024097	1600	0.17	0.03	3.42	0.20	0.18	0.10	1.97	0.08	203.91	1.19	499.63	33.09
	0.219057	2000	0.20	0.07	131.12	0.76	9.48	0.15	52.11	0.20	4279.29	1.60	519.59	2.75
	0.625425	2600	0.61	0.06	277.53	0.46	20.14	0.18	108.63	0.24	9076.14	7.56	524.50	1.38
	0.840441	3200	0.47	0.06	150.23	1.02	8.94	0.12	57.48	0.30	4781.48	3.59	518.42	2.91
	0.883552	4000	1.00	0.07	28.98	0.45	2.29	0.09	11.52	0.15	1209.98	1.32	510.90	12.18
	1.000000	4001	0.86	0.07	77.29	0.44	6.69	0.14	31.13	0.15	2736.86	2.70	512.70	4.43
mc3420			J=	3.94E-03	+/-	1.14E-05	tot.gas.age=	519.26	+/-	2.45	Reten.Age=	521.04	+-	2.45
mc34-20 MMhb-1 Hornblende	F39	Laser Power (mW)	Vol36	Err36	Vol37	Err37	Vol38	Err38	Vol39	Err39	Vol40	Err40	Age(Ma)	AgeErr
	0.003939	0	5.13	0.10	4.14	0.30	1.45	0.11	1.60	0.08	1516.11	1.77	-0.64	136.75
	0.004546	100	-0.11	0.10	0.32	0.25	0.41	0.10	0.25	0.10	-5.48	1.73	662.72	630.82
	0.005058	150	-0.04	0.11	0.06	0.22	0.10	0.10	0.21	0.09	-8.50	1.44	121.84	1059.67
	0.005788	200	-0.20	0.12	0.63	0.26	0.19	0.10	0.30	0.10	-6.07	1.97	969.57	563.21
	0.006674	250	0.15	0.12	0.33	0.20	0.36	0.10	0.36	0.10	-2.10	1.58	-1266.15	1518.60
	0.007747	300	0.04	0.07	0.13	0.20	0.28	0.10	0.44	0.06	9.68	1.94	-49.20	356.31
	0.009047	400	-0.10	0.14	0.49	0.19	0.52	0.12	0.53	0.07	92.49	1.95	1165.00	323.56
	0.010648	500	-0.12	0.10	0.39	0.16	0.66	0.11	0.65	0.08	45.49	2.34	727.75	230.33
	0.012343	600	-0.14	0.08	0.28	0.15	0.54	0.12	0.69	0.06	25.46	1.75	574.18	176.73
	0.013407	800	-0.18	0.07	0.03	0.18	0.10	0.12	0.43	0.07	12.42	1.73	856.61	230.37
	0.014505	1000	0.27	0.09	0.31	0.33	0.30	0.06	0.45	0.06	60.45	1.64	-366.13	499.42
	0.016151	1200	0.51	0.12	0.31	0.37	0.81	0.07	0.67	0.08	109.38	2.32	-497.49	483.19
	0.018761	1600	0.44	0.11	0.76	0.25	0.37	0.06	1.06	0.06	161.40	1.30	202.47	188.83
	0.024816	2000	0.60	0.11	4.73	0.34	0.69	0.08	2.46	0.10	322.77	1.85	375.76	76.96
	0.257160	2600	0.91	0.10	231.95	0.93	17.69	0.15	94.34	0.48	8319.26	19.17	522.55	3.06
	0.812563	3200	1.10	0.13	578.31	1.64	39.03	0.20	225.51	0.82	19666.09	7.27	524.77	1.88
	1.000000	4000	0.34	0.12	193.01	0.88	11.48	0.18	76.10	0.22	6623.37	9.90	524.50	2.81
mc3112			J=	4.86E-03	+/-	1.32E-05	tot.gas.age=	97.96	+/-	0.32	Reten.Age=	98.25	+-	0.32
mc31-12 GA1550 Biotite	F39	Laser Power (mW)	Vol36	Err36	Vol37	Err37	Vol38	Err38	Vol39	Err39	Vol40	Err40	Age(Ma)	AgeErr
	0.003180	0	4.05	0.09	3.26	0.41	3.34	0.11	17.66	0.18	1207.08	1.51	4.70	13.06
	0.003695	100	0.81	0.14	-0.31	0.35	0.59	0.09	2.86	0.06	250.61	0.77	36.92	120.96
	0.003957	150	0.48	0.11	0.14	0.45	0.36	0.07	1.46	0.07	110.30	0.79	-198.64	227.95
	0.004207	200	0.39	0.12	0.29	0.48	0.22	0.10	1.39	0.09	84.05	0.92	-207.19	258.24
	0.004472	250	0.40	0.12	0.33	0.34	0.19	0.13	1.47	0.18	108.92	0.53	-63.39	212.59
	0.004846	300	0.27	0.07	0.19	0.29	0.44	0.05	2.08	0.13	82.16	1.00	10.64	86.32
	0.005755	400	0.43	0.07	0.45	0.25	1.09	0.13	5.05	0.10	128.10	0.89	-0.33	34.73
	0.006903	500	1.96	0.06	0.17	0.22	1.58	0.11	6.37	0.14	603.84	0.92	32.36	23.73
	0.008316	600	1.00	0.09	0.92	0.33	1.76	0.09	7.85	0.14	287.49	0.93	-9.40	31.43
	0.012913	800	1.27	0.07	1.14	0.32	5.63	0.15	25.53	0.16	533.55	1.34	53.11	6.98
	0.023014	1000	1.10	0.09	1.08	0.30	12.74	0.17	56.09	0.39	925.77	0.82	91.59	4.04
	0.038751	1200	1.37	0.08	0.81	0.31	19.52	0.20	87.39	0.31	1396.54	1.69	96.85	2.16
	0.076841	1600	2.24	0.13	1.87	0.37	48.21	0.20	211.52	0.69	3030.11	1.49	95.64	1.55
	0.158757	2000	1.91	0.07	2.88	0.34	106.04	0.44	454.88	0.60	5839.64	3.58	98.97	0.42
	0.339306	2600	2.41	0.07	3.98	0.30	232.18	0.66	1002.60	1.61	12384.36	9.52	99.34	0.24
	0.541693	3200	2.36	0.10	5.13	0.25	257.55	0.47	1123.87	0.77	13798.27	8.12	99.45	0.24
	0.789583	4000	2.70	0.08	3.78	0.47	313.83	0.84	1376.56	2.03	16824.92	9.82	99.33	0.20
	0.903019	4001	1.29	0.09	1.23	0.31	142.80	0.54	629.92	0.97	7664.16	4.35	98.67	0.38
	1.000000	4002	2.12	0.07	1.14	0.32	122.74	0.39	538.54	1.25	6918.92	5.41	99.66	0.40
mc3516			J=	3.75E-03	+/-	1.25E-05	tot.gas.age=	1057.00	+/-	3.31	Reten.Age=	1068.07	+-	3.30
mc35-15 3gr hornblende	F39	Laser Power (mW)	Vol36	Err36	Vol37	Err37	Vol38	Err38	Vol39	Err39	Vol40	Err40	Age(Ma)	AgeErr
	0.012909	0	6.27	0.17	15.14	0.54	6.27	0.11	4.94	0.11	1788.91	3.10	-91.28	74.24
	0.016009	200	0.16	0.06	3.27	0.38	1.37	0.11	1.19	0.07	110.63	0.90	330.37	79.99
	0.019331	400	0.18	0.08	3.29	0.35	0.82	0.10	1.27	0.07	170.50	1.13	541.91	101.41
	0.021437	600	0.08	0.11	0.95	0.33	0.51	0.05	0.81	0.06	150.27	0.81	831.19	184.71
	0.022963	800	-0.04	0.08	0.93	0.29	0.59	0.05	0.58	0.07	165.88	0.84	1381.50	175.31
	0.024536	1000	0.13	0.09	1.07	0.37	0.59	0.09	0.60	0.08	180.43	1.17	1143.08	188.25
	0.027931	1200	0.12	0.10	2.50	0.42	1.20	0.09	1.30	0.09	342.97	1.10	1149.33	96.34
	0.065607	1600	0.27	0.09	40.42	0.79	15.86	0.12	14.41	0.12	3311.64	5.73	1101.99	9.84
	0.235202	2000	0.32	0.08	199.27	1.48	69.43	0.42	64.86	0.25	14330.71	8.70	1083.89	3.46
	0.444393	2400	0.41	0.08	246.70	1.14	88.54	0.21	80.00	0.38	17497.19	11.65	1075.42	4.08
	0.680071	2800	0.39	0.08	277.87	1.54	99.54	0.54	90.13	0.43	19340.50	12.70	1060.88	3.97
	0.780436	3200	0.29	0.07	118.70	0.99	43.34	0.23	38.38	0.24	8310.40	4.69	1064.58	5.41
	0.891228	3600	0.41	0.09	134.55	1.18	50.16	0.30	42.37	0.14	9214.67	6.62	1065.74	3.53
	0.939068	4000	0.43	0.11	58.69	0.60	21.96	0.16	18.30	0.11	4093.37	6.27	1074.01	8.07
	1.000000	4001	1.26	0.10	72.38	0.90	25.01	0.17	23.30	0.21	5328.21	9.82	1058.66	8.97
mc3111			J=	4.90E-03	+/-	1.16E-05	tot.gas.age=	26.57	+/-	0.41	Reten.Age=	26.98	+-	0.39
mc31-11 FCT-3 Biotite	F39	Laser Power (mW)	Vol36	Err36	Vol37	Err37	Vol38	Err38	Vol39	Err39	Vol40	Err40	Age(Ma)	AgeErr
	0.009422	0	3.85	0.12	1.63	0.39	2.32	0.14	20.97	0.30	1099.46	1.55	-16.50	15.16
	0.010217	100	0.15	0.05	0.00	0.26	0.10	0.10	1.77	0.10	23.18	0.58	-102.11	85.93
	0.010673	150	0.09	0.08	0.95	0.30	0.01	0.08	1.02	0.06	18.31	0.67	-74.64	219.62
	0.011115	200	0.04	0.03	0.66	0.23	-0.01	0.08	0.98	0.10	13.91	0.57	7.53	84.92
	0.011549	250	-0.05	0.07	0.72	0.31	0.05	0.08	0.97	0.08	14.08	0.66	246.81	165.57
	0.012280	300	0.18	0.07	0.26	0.30	-0.05	0.07	1.63	0.09	29.30	0.71	-138.42	116.47
	0.013590	400	0.13	0.10	0.50	0.34	0.22	0.07	2.91	0.12	34.83	0.61	-14.66	87.62
	0.015258	500	0.13	0.07	0.43	0.34	0.15	0.10	3.71	0.11	39.31	0.69	-0.56	49.82
	0.017717	600	0.13	0.08	0.23	0.35	0.81	0.12	5.47	0.15	47.04	0.61	13.52	39.69
	0.023968	800	0.28	0.07	0.88	0.33	1.63	0.09	13.91	0.16	107.30	0.82	14.78	13.72
	0.035990	1000	0.43	0.05	-0.02	0.20	3.02	0.09	26.76	0.29	168.61	0.89	13.35	5.09
	0.054046	1200	0.50	0.07	-0.36	0.48	4.53	0.09	40.19	0.33	249.79	0.88	22.36	4.25
	0.102854	1600	0.83	0.05	0.22	0.27	12.08	0.24	108.65	0.27	562.91	0.91	25.77	1.23
	0.193788	2000	0.92	0.06	1.68	0.33	22.50	0.15	202.41	0.48	902.44	1.14	27.38	0.75
	0.337269	2600	1.18	0.08	1.68	0.27	33.98	0.14	319.38	0.64	1351.64	1.35	27.58	0.63
	0.523960	3200	1.13	0.11	3.55	0.36	45.31	0.21	415.56	0.93	1658.11	2.02	27.95	0.70
	0.775075	4000	1.61	0.11	6.96	0.42	61.13	0.19	558.97	1.07	2253.24	2.55	27.89	0.52
	1.000000	4001	1.83	0.12	6.19	0.55	54.89	0.30	500.67	0.40	2116.05	1.77	27.62	0.63
mc3205			J=	4.15E-03	+/-	8.54E-06	tot.gas.age=	28.41	+/-	0.13	Reten.Age=	28.38	+-	0.12
mc32-5 TCR-2 Sanidine	F39	Laser Power (mW)	Vol36	Err36	Vol37	Err37	Vol38	Err38	Vol39	Err39	Vol40	Err40	Age(Ma)	AgeErr
	0.000448	0	3.03	0.10	0.19	0.13	1.42	0.10	1.75	0.09	919.07	1.13	97.66	125.81
	0.266733	4000	0.00	0.13	25.73	0.66	0.80	0.21	1039.79	1.53	3974.27	2.48	28.40	0.27
	0.561024	4000	0.19	0.11	22.21	0.47	0.69	0.14	1149.15	2.01	4432.33	1.53	28.30	0.21
	1.000000	4000	-0.10	0.06	32.23	0.63	1.51	0.26	1714.11	2.25	6525.42	3.04	28.42	0.08
mc3206			J=	4.08E-03	+/-	1.58E-05	tot.gas.age=	27.80	+/-	0.13	Reten.Age=	27.87	+-	0.12
mc32-6 FCT-2 Sanidine	F39	Laser Power (mW)	Vol36	Err36	Vol37	Err37	Vol38	Err38	Vol39	Err39	Vol40	Err40	Age(Ma)	AgeErr
	0.001846	0	12.49	0.17	0.94	0.13	4.43	0.07	16.88	0.19	3671.92	3.33	-8.86	22.15
	0.651014	4000	1.09	0.17	52.28	0.72	8.69	0.26	5938.29	4.48	23115.23	10.20	28.00	0.07
	0.900970	4000	0.88	0.14	16.24	0.45	2.44	0.15	2286.48	1.20	8903.96	3.43	27.58	0.13
	1.000000	4000	0.38	0.11	7.79	0.44	1.65	0.17	905.88	1.63	3552.71	2.74	27.71	0.27
